# Supplementary material for: Iodine-trapping strategy for light-heat stable inverted perovskite solar cells under ISOS protocols
Source: Royal Society of Chemistry journal article supplement (doi:10.1039/d3ee03405d), 2023-01-01
Supplement: d3ee03405d1.pdf [file d3ee03405d1.pdf]

## SUPPLEMENTAL INFORMATION

# Iodine-trapping Strategy for Light-heat Inverted Stable Perovskite Solar Cells under ISOS Protocols

Xiaodong Li\*, Hui Yang, Acan Liu, Chunyan Lu, Haobo Yuan, Wenxiao Zhang and Junfeng Fang\*

School of Physics and Electronic Science, Engineering Research Center of Nanophotonics & Advanced Instrument, Ministry of Education, East China Normal

University, Shanghai 200062, China

E-mail:

[xdli@phy.ecnu.edu.cn](mailto:xdli@phy.ecnu.edu.cn);

[jffang@phy.ecnu.edu.cn](mailto:jffang@phy.ecnu.edu.cn)

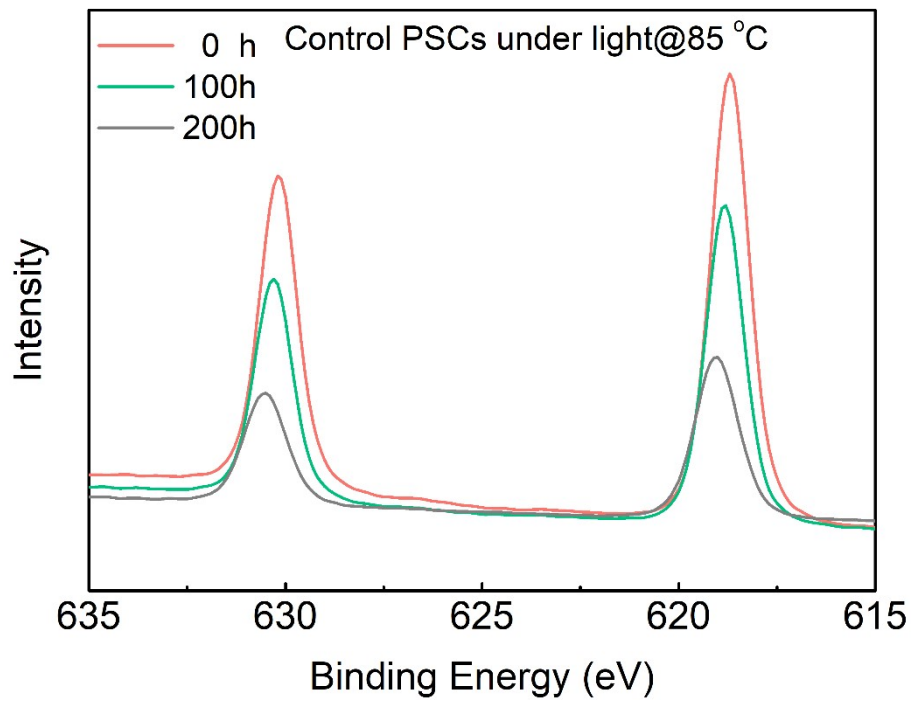

**Fig. S1.** XPS of I 3d in control PSCs under light and 85 °C aging.

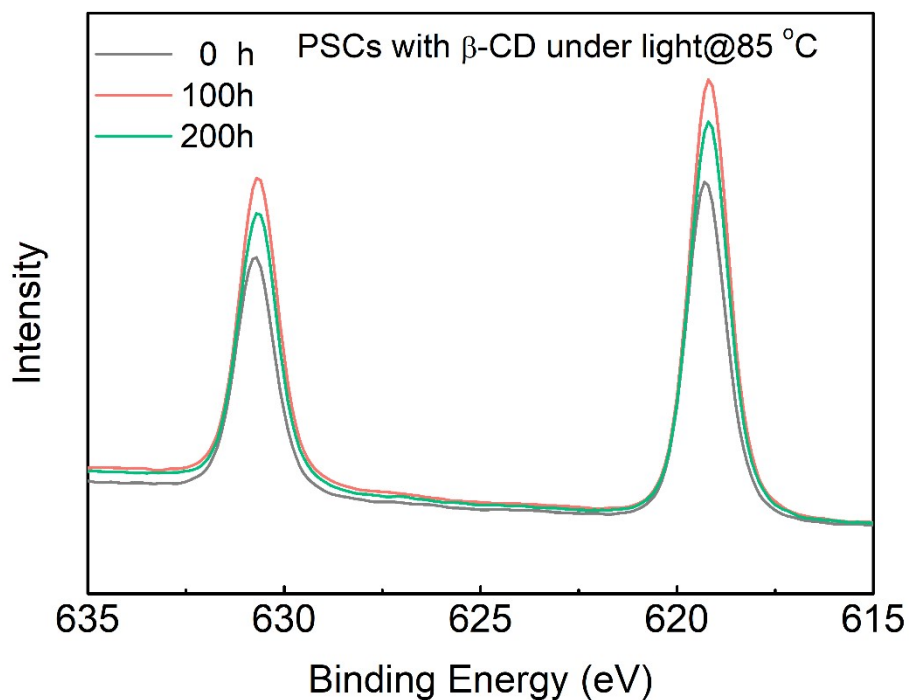

**Fig. S2.** XPS of I 3d in PSCs with  $\beta$ -CD under light and 85 °C aging.

| Sample            | Aging time | I      | Pb     | I/Pb | Pb <sup>0</sup> /(Pb <sup>0</sup> +Pb <sup>2+</sup> ) |
|-------------------|------------|--------|--------|------|-------------------------------------------------------|
| PSCs@ $\beta$ -CD | 0 h        | 77.33% | 22.67% | 3.41 | 2.34%                                                 |
|                   | 100 h      | 76.76% | 23.24% | 3.3  | 2.70%                                                 |
|                   | 200 h      | 76.48% | 23.52% | 3.25 | 2.68%                                                 |
| Control PSCs      | 0 h        | 78.33% | 21.67% | 3.61 | 2.47%                                                 |
|                   | 100 h      | 76.80% | 23.20% | 3.31 | 2.90%                                                 |
|                   | 200 h      | 71.68% | 28.32% | 2.53 | 4.41%                                                 |

**Table S1.** I, Pb atomic concentration, I/Pb atomic ratio and Pb<sup>0</sup> content obtained from XPS.

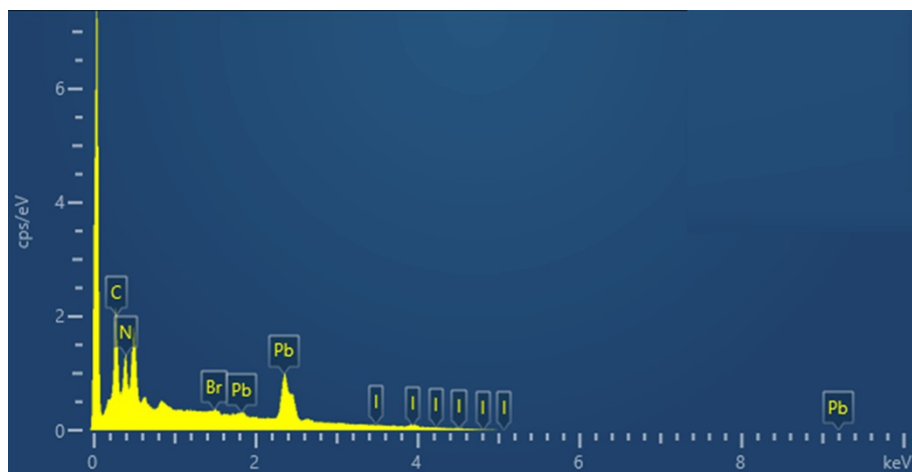

**Fig. S3.** I and Pb spectra during SEM-EDS mapping in control perovskite.

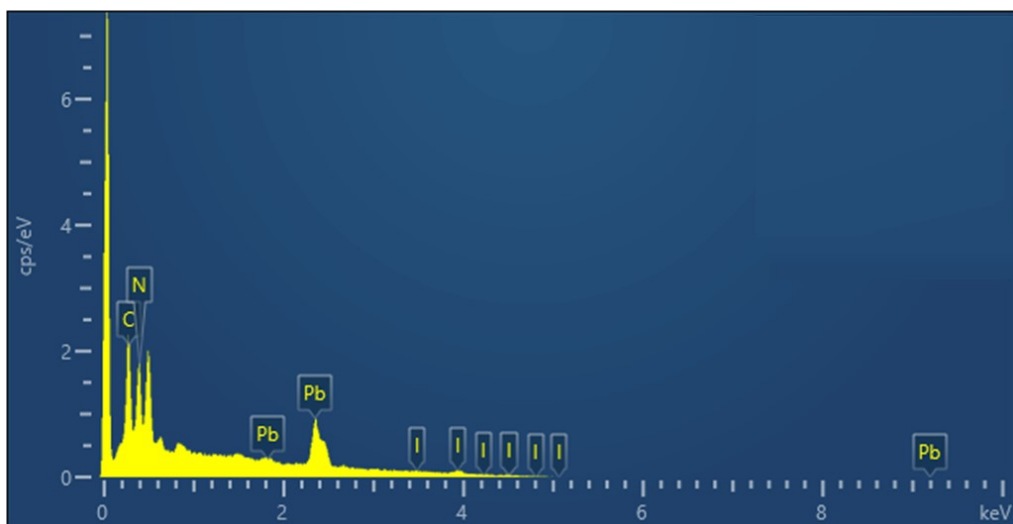

**Fig. S4.** I and Pb spectra during SEM-EDS mapping in perovskite with  $\beta$ -CD.

| Sample                       | I      | Pb     | C      | I/Pb |
|------------------------------|--------|--------|--------|------|
| Aged perovskite@ $\beta$ -CD | 41.12% | 13.29% | 45.59% | 3.09 |
| Aged control perovskite      | 16.06% | 37.92% | 46.02% | 2.36 |

**Table S2.** C, I and Pb atomic concentration and I/Pb atomic ration obtained in SEM-EDS mapping.

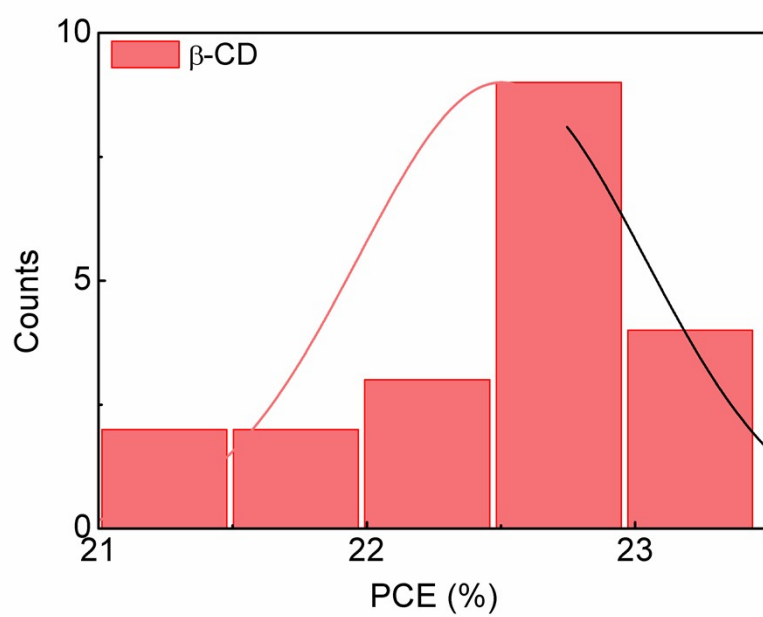

**Fig. S5.** Statistic distribution of device efficiency in PSCs with  $\beta$ -CD among 20 devices.

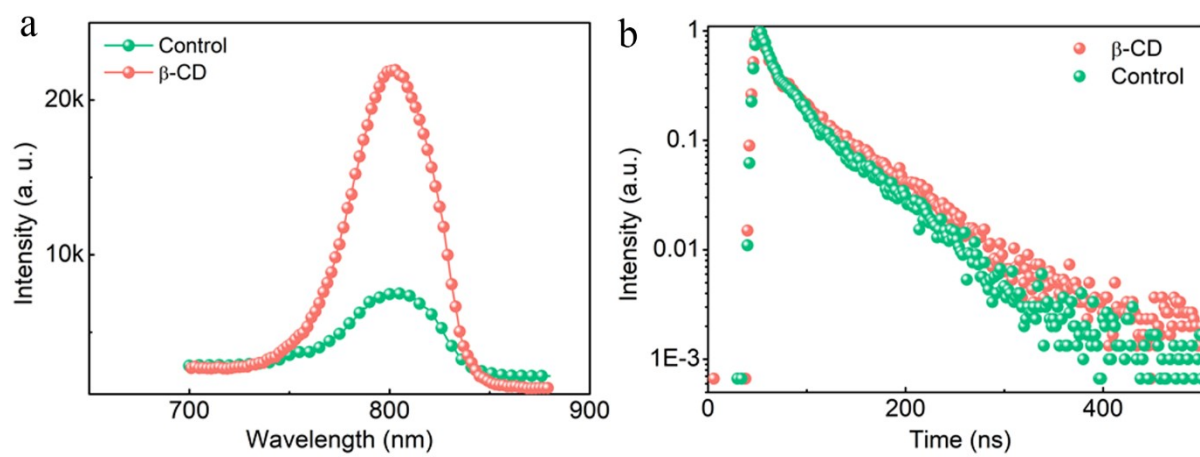

**Fig. S6.** Defects passivation in perovskite with  $\beta$ -CD. (a) PL and (b) TRPL of perovskite films.

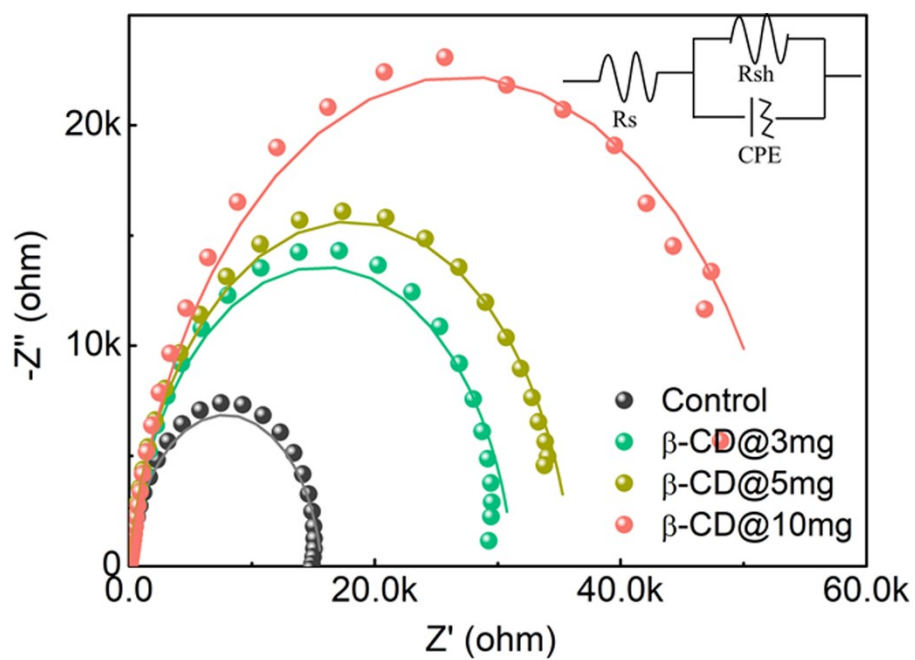

**Fig. S7.** Electrochemical impedance spectroscopy (EIS) of PSCs with different concentration of  $\beta$ -CD.

| Concentration of $\beta$ -CD (mg/mL) | $R_s$ ( $\Omega$ ) | $R_{sh}$ (k $\Omega$ ) |
|--------------------------------------|--------------------|------------------------|
| 0                                    | 27.2               | 15.6                   |
| 3                                    | 32.2               | 31.3                   |
| 5                                    | 31.1               | 36.0                   |
| 10                                   | 50.6               | 54.0                   |

**Table S3.** The series ( $R_s$ ) resistance and shunt resistance ( $R_{sh}$ ) of PSCs obtained from EIS fitting.



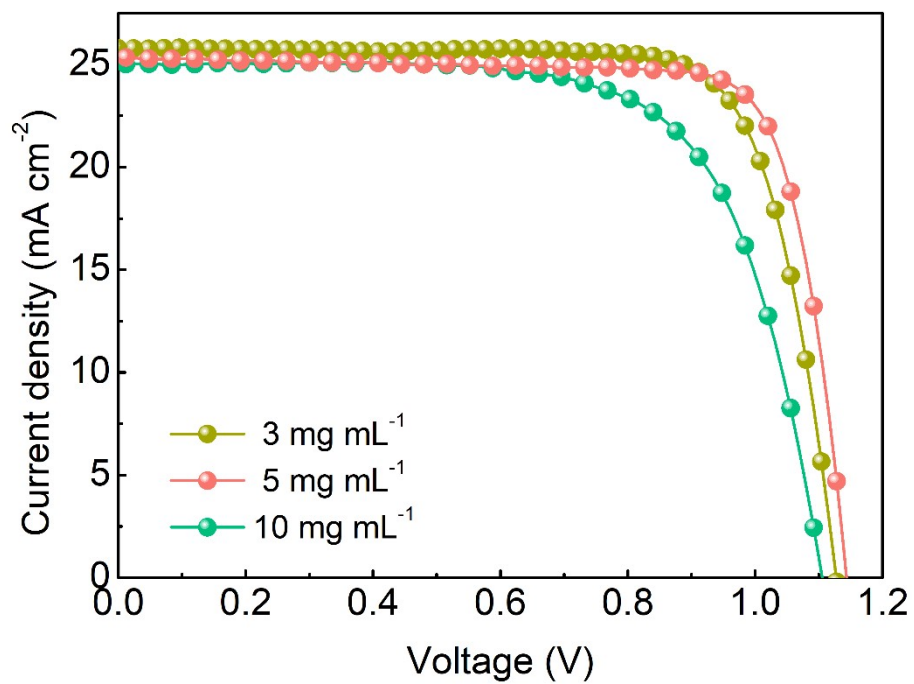

**Fig. S8.** The *J-V* curves of PSCs with different concentration of  $\beta$ -CD.

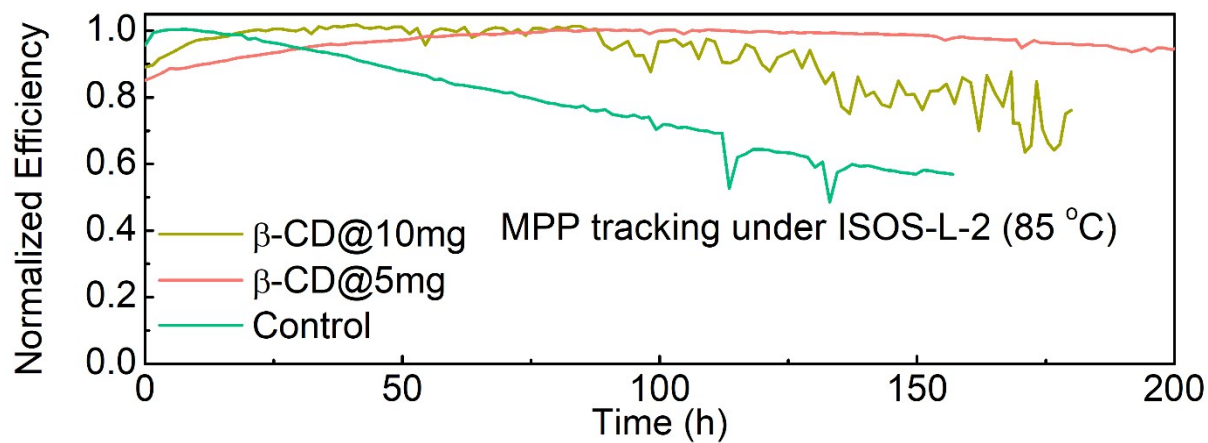

**Fig. S9.** The effect of  $\beta$ -CD concentration on device stability.

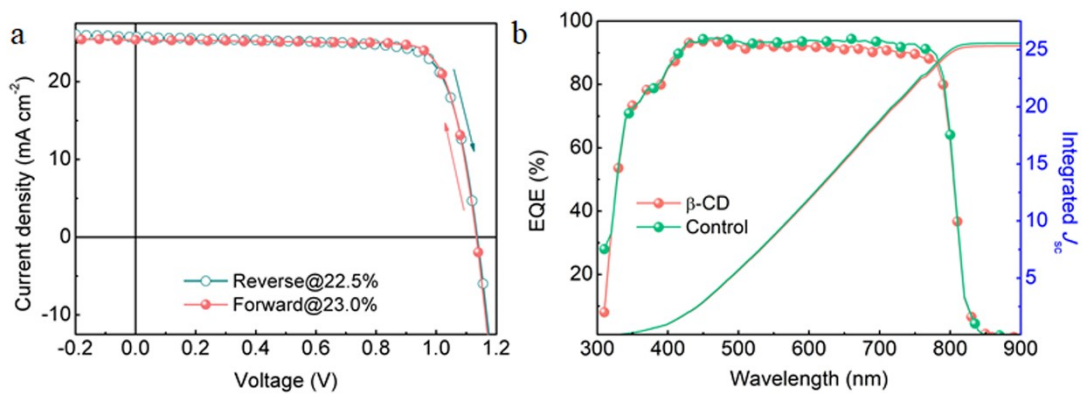

**Fig. S10.** (a)  $J$ - $V$  hysteresis and (b) EQE and integrated current density in PSCs with  $\beta$ -CD.

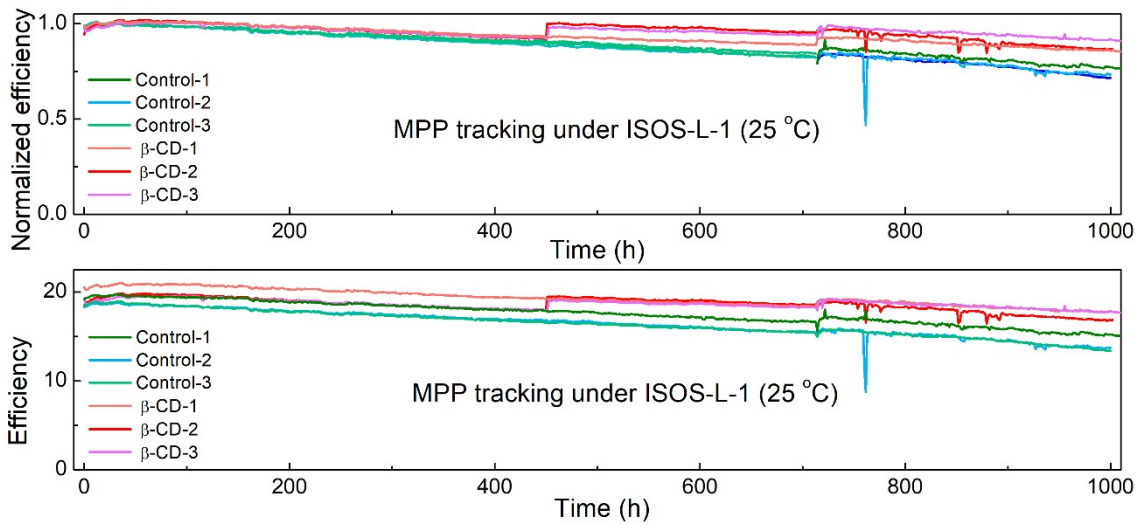

**Fig. S11.** MPP tracking and non-normalized data of 3 separated PSCs under ISOS-L-1 conditions at 25 °C.

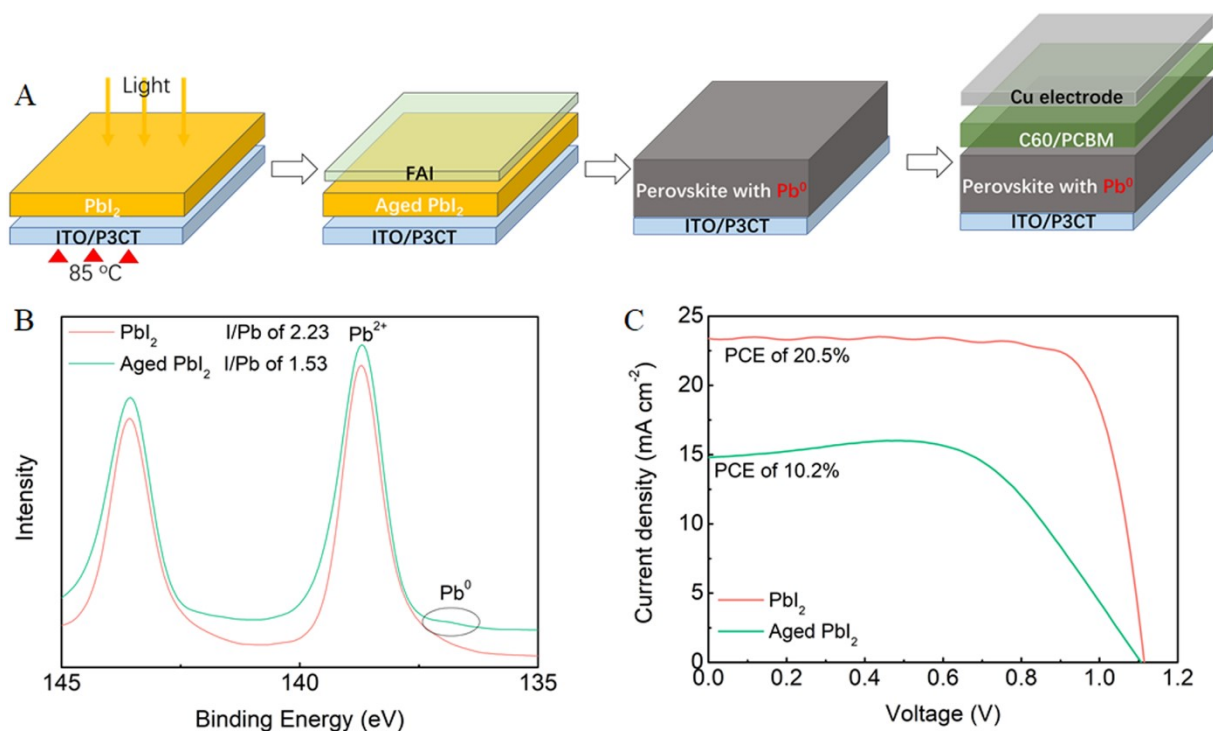

**Fig. S12.** Extra experiment to verify the harmful effect of Pb<sup>0</sup> on devices performance. (a) Schematic diagram of experiment, (b) XPS of Pb 4f in fresh and aged PbI<sub>2</sub> films, (c) *J-V* curves of PSCs fabricated with fresh or aged PbI<sub>2</sub> films with typical two-step method.

To exclude other components (FAI or CsI species) effect and provide direct evidence of Pb<sup>0</sup> on devices performance, we spin-coat PbI<sub>2</sub> on ITO/P3CT substrates and then put these samples under light-heat (85 °C) conditions for 50 h to introduce some Pb<sup>0</sup> sites. Then we further spin-coat fresh FAI solution onto these PbI<sub>2</sub> films to fabricate PSCs using typical two-step methods.

XPS results on aged PbI<sub>2</sub> show that I/Pb atom ratio decreases from initial 2.23 to 1.53 after aging, together with obvious Pb<sup>0</sup> signals (~136.8 eV, Fig. S12b), further confirming the existence of iodine escaping and Pb<sup>0</sup> generation even in PbI<sub>2</sub> films. For PSCs with fresh PbI<sub>2</sub>, good efficiency of over 20% can be obtained (Fig. S12c). While in PSCs with aged PbI<sub>2</sub> containing Pb<sup>0</sup> sites, much lower efficiency of ~10% is obtained. Since the FAI component in PSCs is fresh without any degradation, such low efficiency can only be caused by Pb<sup>0</sup>, confirming its harmful effect on PSCs performance.

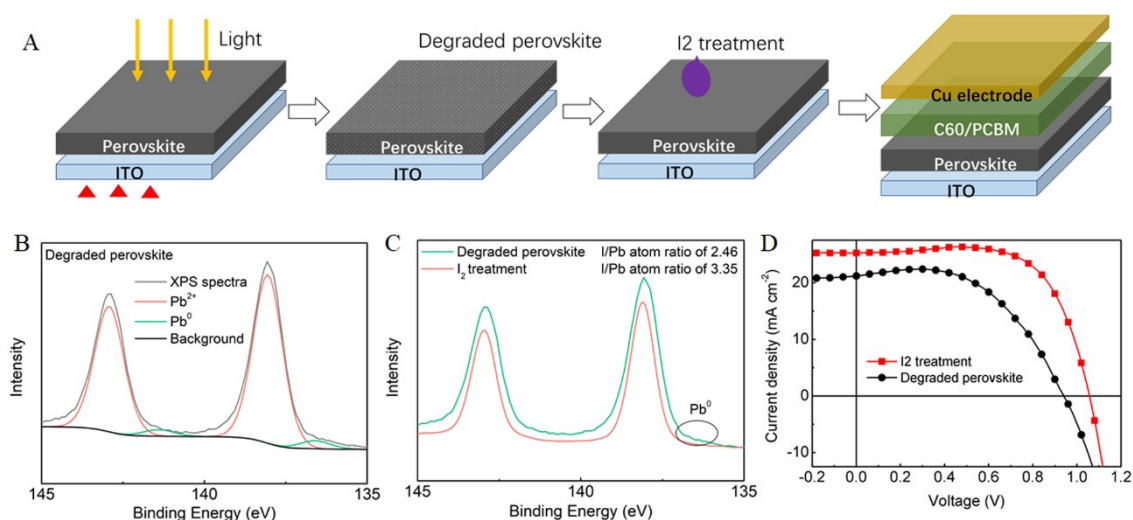

**Fig. S13.** Extra experiment to verify the beneficial effect of effect of  $I_2$  trapping on device. (a) Schematic diagram of experiment, (b) XPS of Pb 4f in aged perovskite films, (c) XPS of Pb 4f in aged perovskite films after  $I_2$  treatment, (d)  $J$ - $V$  curves of PSCs fabricated with aged perovskite films with or without  $I_2$  treatment.

To confirm that  $I_2$  can indeed react with the  $Pb^0$  generated in perovskite films, we design an experiment as shown in Fig. S13a. Perovskite films are aged under light and 85 °C conditions for 200 h. Then the degraded perovskite films are treated with  $I_2$  solution in CB (1-3 mg/mL). XPS results demonstrate that  $Pb^0$  sites appear in aged perovskite films (Fig. S13b). However, after  $I_2$  treatment, the  $Pb^0$  peaks disappear, indicating its reaction with  $I_2$ . I/Pb atom ratio is also increased from 2.46 of degraded perovskite to 3.35 after  $I_2$  treatment (Fig. S13c), further demonstrating the reaction between  $I_2$  and  $Pb^0$  even in real perovskite conditions.

In addition, if we use such degraded perovskite films to fabricate PSCs, much lower efficiency of ~11% is obtained (Fig. S13d). However, if we treat such perovskite film with  $I_2$  to eliminate  $Pb^0$  sites and then fabricate PSCs, the devices efficiency can recover to over 18% (Fig. S13d). This result directly demonstrates that iodine escaping and  $Pb^0$  generation in perovskite films indeed strongly affect devices performance and that  $I_2$  can react with and eliminate  $Pb^0$  sites to inhibit its harmful influence on devices performance.

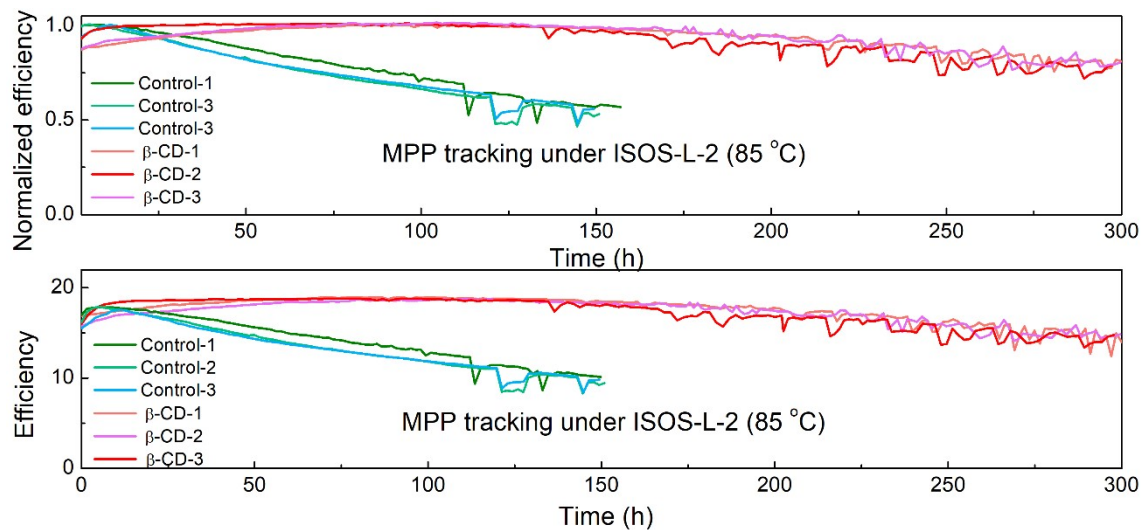

**Fig. S14.** MPP tracking and non-normalized data of 3 separated PSCs under ISOS-L-2 conditions at 85 °C.

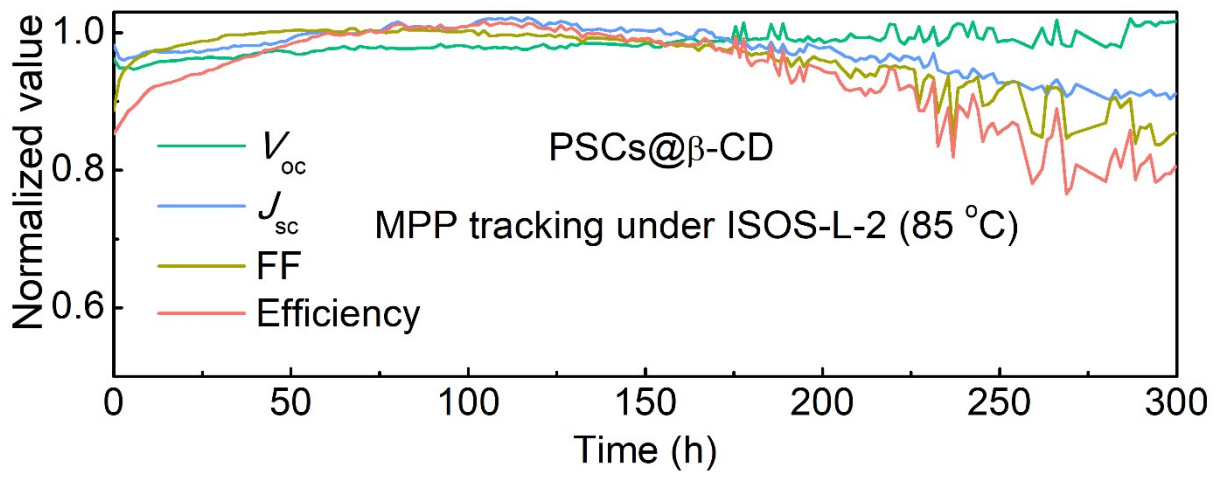

**Fig. S15.** Specific parameter variation during MPP tracking under ISOS-L-2 (take device of  $\beta$ -CD-2 in Fig. S14 for example).
